# Supplementary figures and images for: Genetic overlap and causal inferences between diet-derived antioxidants and small-cell lung cancer
Source: PubMed Central journal article supplement — Medicine (Baltimore). 2024 Feb 23;103(8):e37206. doi: 10.1097/MD.0000000000037206 (PMC11309643; doi:10.1097/md.0000000000037206), 2024-02-23

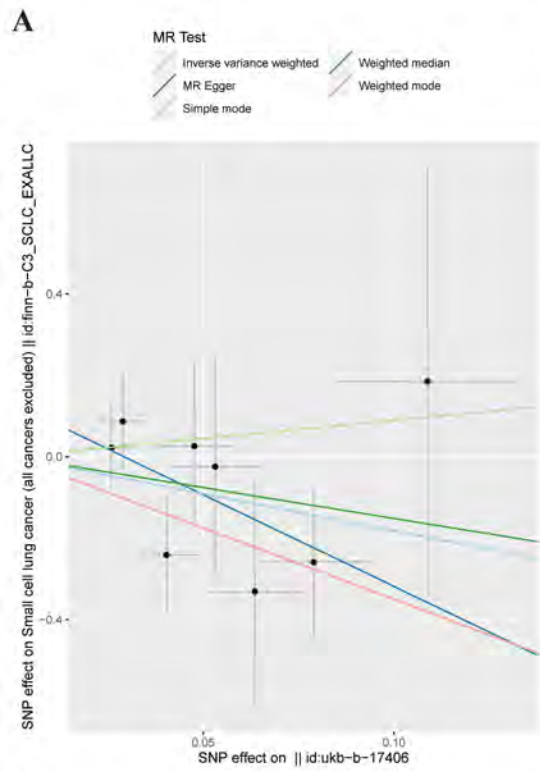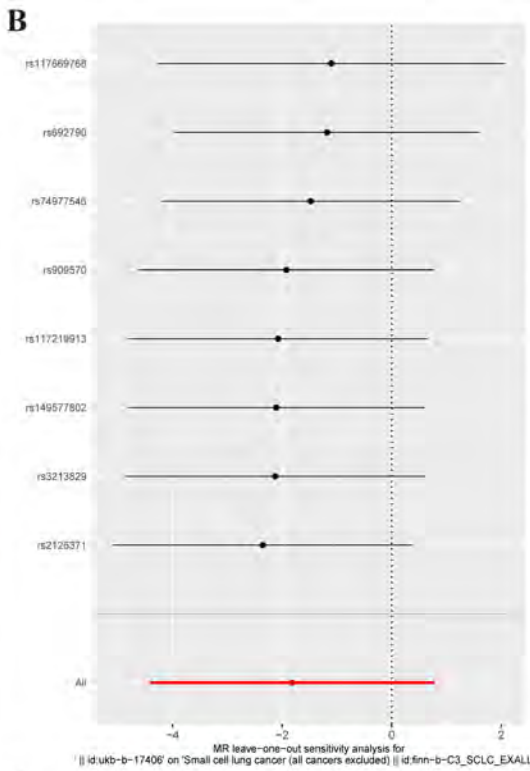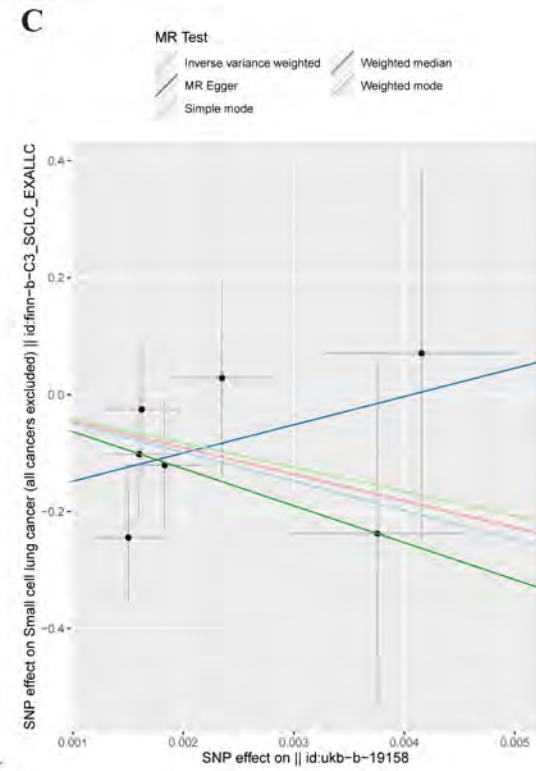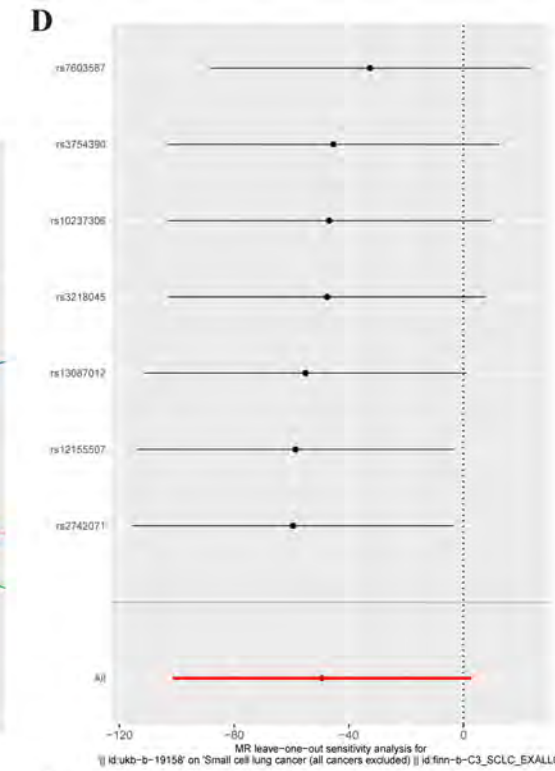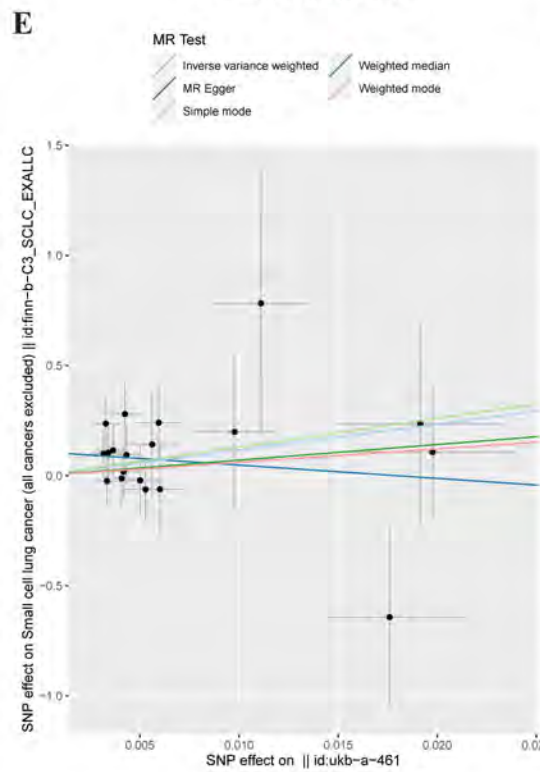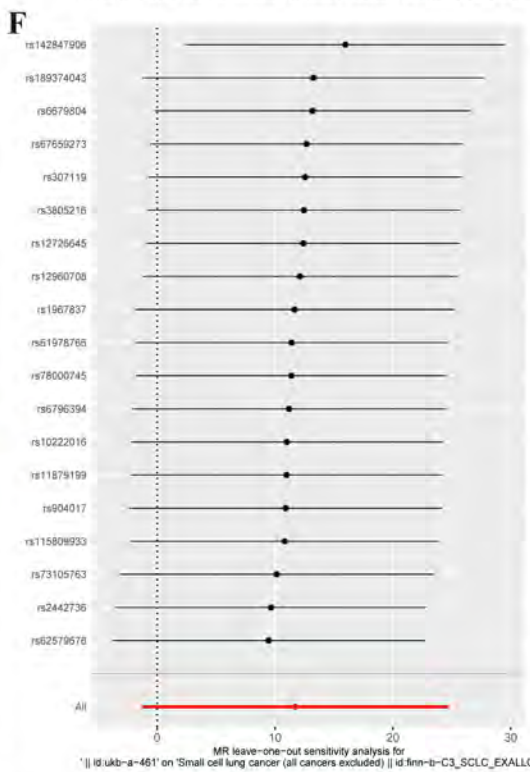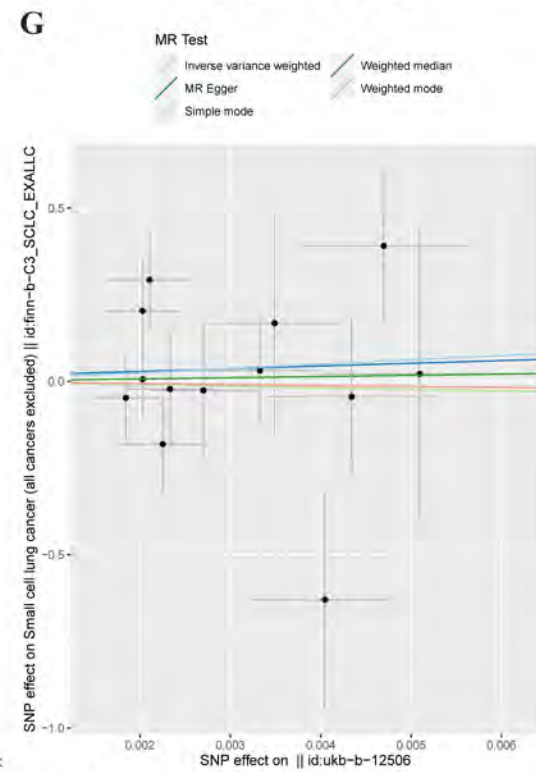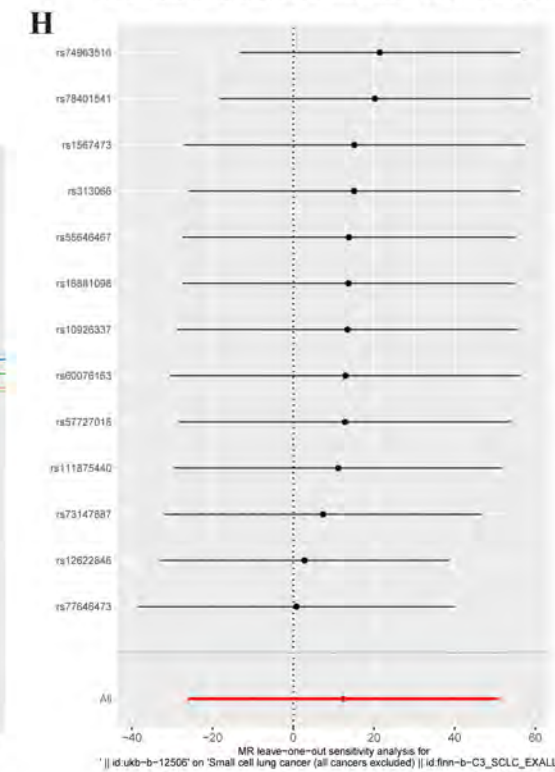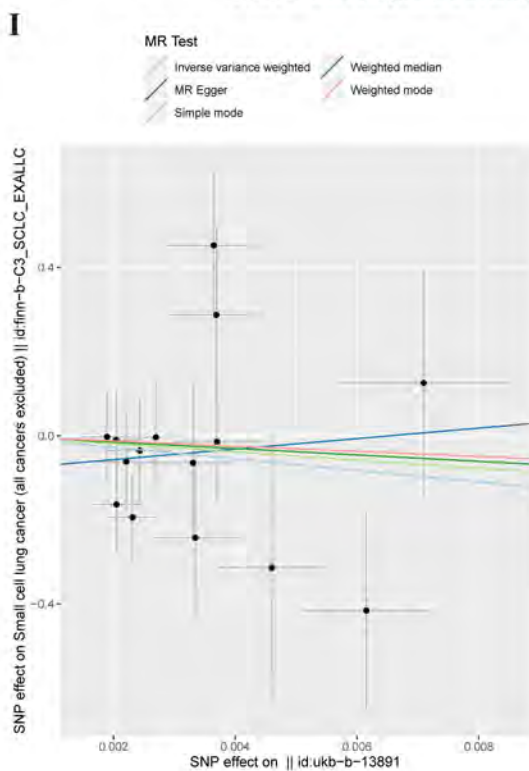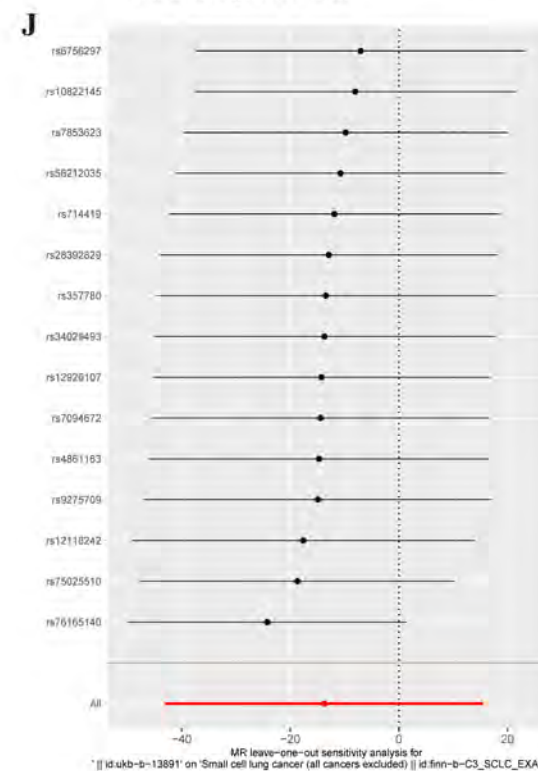

Supplement: medi-103-e37206-s006.pdf [file medi-103-e37206-s006.pdf]
